# Supplementary material for: Preparation and characterization of rose-like NiO nanostructures
Source: Royal Society of Chemistry journal article supplement (doi:10.1039/c0ce00975j), 2011-01-01
Supplement: c0ce00975j.pdf [file c0ce00975j.pdf]

## Electronic Supplementary Information

### Preparation and Characterization of Rose-like NiO Nanostructures

Shuqin Shang, Keyan Xue, Dairong Chen\* and Xiuling Jiao

Key Laboratory for Special Functional Aggregate Materials, Education Ministry, School of Chemistry and Chemical Engineering, Shandong University, Jinan 250100, People's Republic of China. E-mail: cdr@sdu.edu.cn; Fax: +86-0531-88364281; Tel: +86-0531-88364280

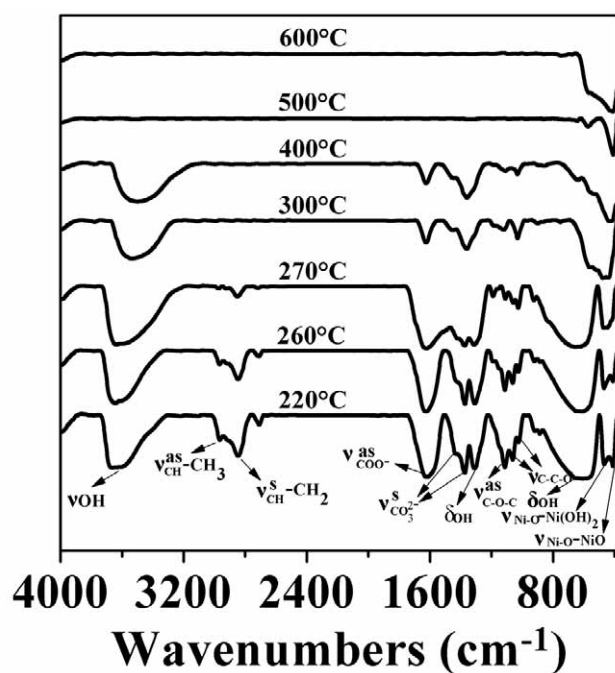

**Fig. S1** The IR of products by heating the  $\alpha$ -Ni(OH)<sub>2</sub> at the rate of 10 °C/min to different temperature and calcined for 1h.

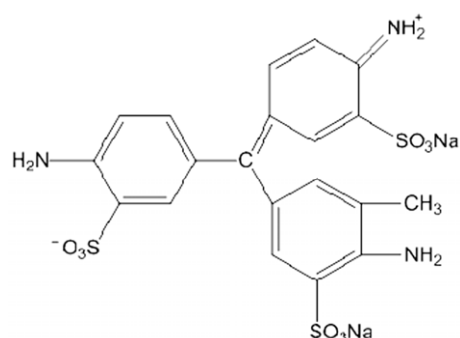

**Fig. S2** Structure of the acid fuchsine molecule.

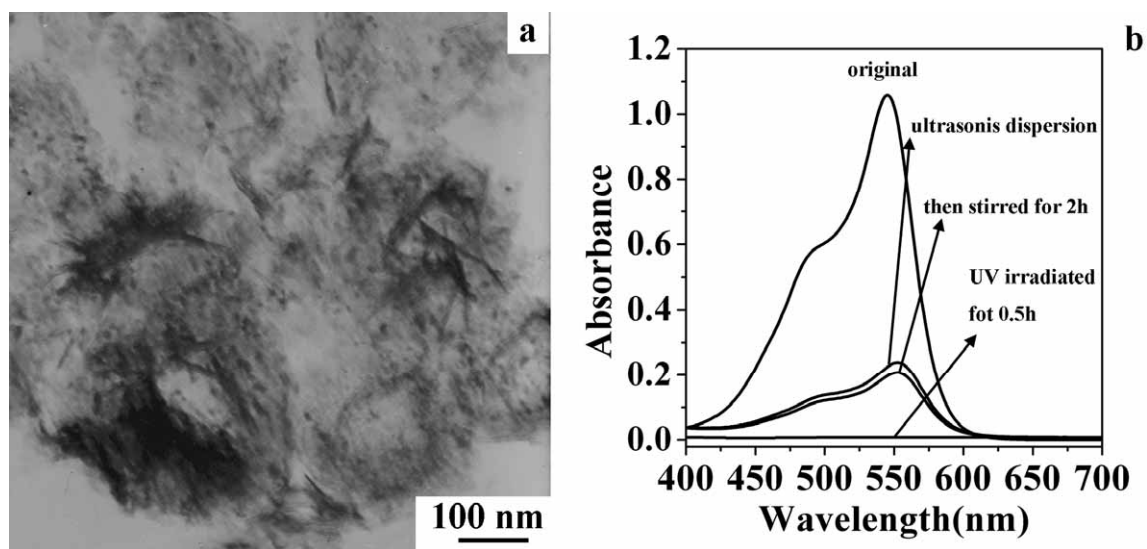

**Fig. S3** (a)TEM image of rose-like NiO structures after grinding for 0.5h and (b) UV-vis spectra of acid fuchsin solution under the photocatalysis of rose-like NiO structures after grinding.

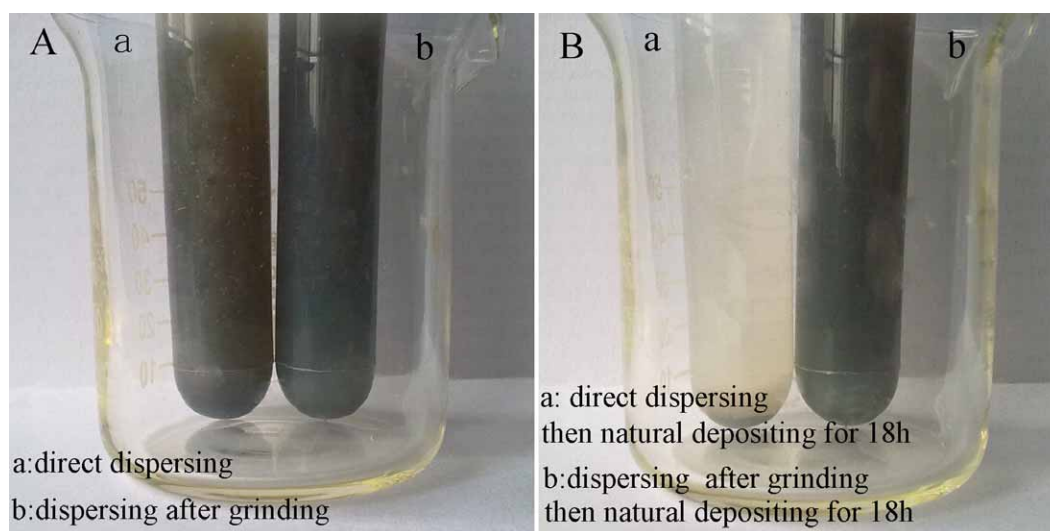

**Fig. S4** Natural depositing of the rose-like NiO structure and the destroyed rose-like structure.

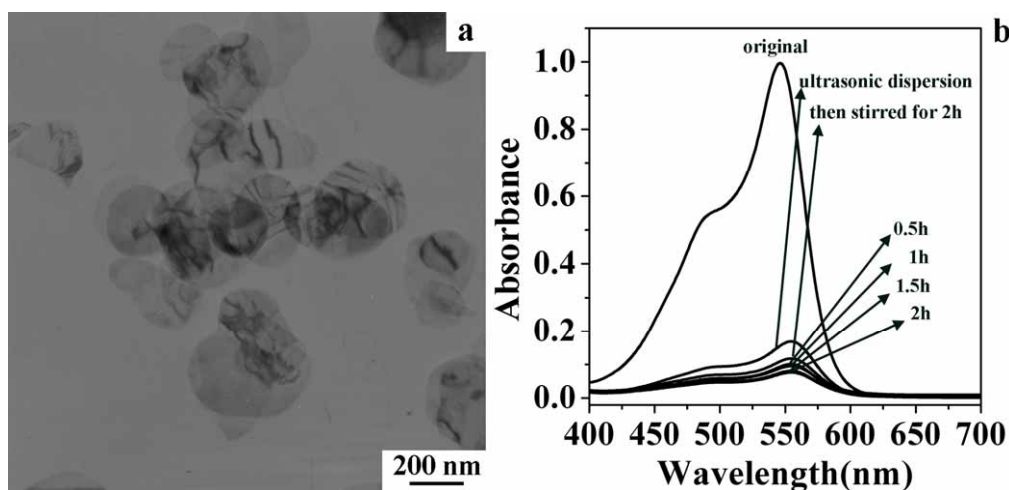

Fig. S5 (a) TEM image of NiO nanosheets from  $\beta$ -Ni(OH)<sub>2</sub> and (b) UV-vis spectra of acid fuchsine solution under the photocatalysis of NiO nanosheets.

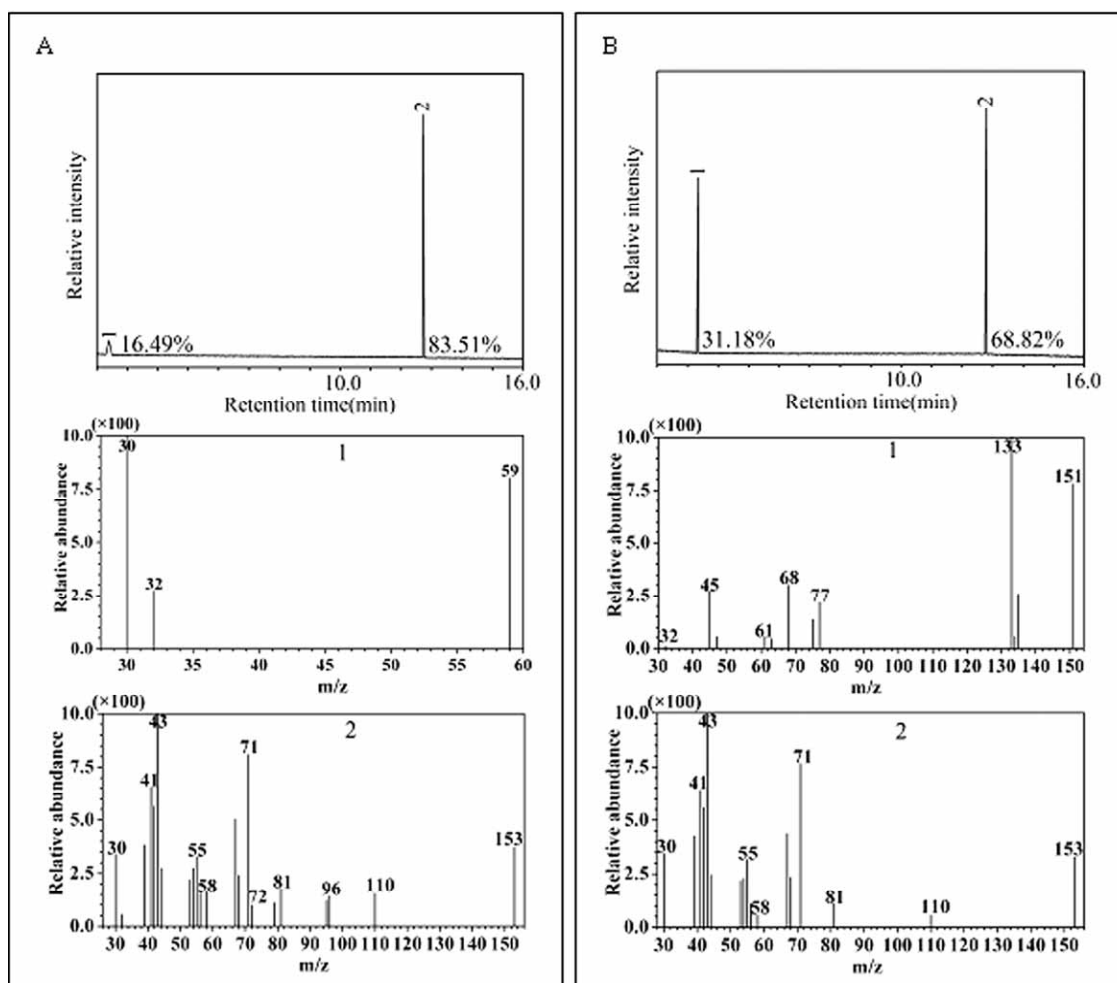

Fig. S6 GC/MS chromatogram of filtrate after photocatalytic degradation aqueous solution of acid fuchsine for 0.5 h by ultraviolet light irradiation using NiO (A) and P25 (B) as photocatalysts.
